# Supplementary material
Source: PubMed Central journal article supplement (PMC8526581)
Supplement: 41433_2020_1305_MOESM4_ESM.pdf [file 41433_2020_1305_MOESM4_ESM.pdf]

**Supplemental Table 3.** Most severe ROP status observed in each of the 98 eyes during the study period.

|        |          | <b>Most severe ROP<br/>(n=98)</b> | <b>ROP treated<br/>(n=23)</b> |
|--------|----------|-----------------------------------|-------------------------------|
|        | Stage 3+ | 2                                 | 2                             |
|        | Stage 3  | 18                                | 17                            |
| Zone I | Stage 2+ | 0                                 | 0                             |
|        | Stage 2  | 8                                 | 0                             |
|        | Stage 1  | 1                                 | 0                             |
|        | Stage 3+ | 2                                 | 2                             |
|        | Stage 3  | 25                                | 0                             |
| Zone I | Stage 2+ | 0                                 | 0                             |
|        | Stage 2  | 35                                | 0                             |
|        | Stage 1  | 7                                 | 0                             |
