# Supplementary material
Source: PubMed Central journal article supplement (PMC8526581)
Supplement: 41433_2020_1305_MOESM6_ESM.pdf [file 41433_2020_1305_MOESM6_ESM.pdf]

**Supplemental Table 5.** Inter-grader agreement of image grading of lesion features (n=98 eyes)

| <b>Lesion Characteristics</b>                  | <b>% agreement</b> | <b>Weighted Kappa (95% CI)</b> |
|------------------------------------------------|--------------------|--------------------------------|
| Foveal avascular zone                          | 100%               | 1.00 (1.00, 1.00)              |
| Choroidal vascular pattern                     | 100%               | 1.00 (1.00, 1.00)              |
| Hypofluorescent area WITH Hyperfluorescence    | 98.00%             | 0.99 (0.99, 1.00)              |
| Hypofluorescent area WITHOUT Hyperfluorescence | 98.00%             | 0.99 (0.98, 1.00)              |
| Finger-like anastomosis                        | 98.00%             | 0.99 (0.98, 1.00)              |
| Shunts                                         | 86.70%             | 0.96 (0.94, 0.98)              |
| Tangles                                        | 94.90%             | 0.99 (0.97, 1.00)              |
| Hyperfluorescent lesions                       | 94.90%             | 0.99 (0.98, 1.00)              |
| Leakage                                        | 96.90%             | 0.99 (0.98, 1.00)              |
| Capillary obliteration                         | 100%               | 1.00 (1.00, 1.00)              |
